# Supplementary material for: Paediatric medical emergency calls to a Danish Emergency Medical Dispatch Centre: a retrospective, observational study
Source: PubMed Central journal article supplement (PMC5756442; doi:10.1186/s13049-017-0470-1), 2018-01-05
Supplement: 13049_2017_470_MOESM1_ESM.pdf [file 13049_2017_470_MOESM1_ESM.pdf]

---

**Additional file 1: Figure S1: Overview of the categories in the Danish Index for Emergency Care**

The main symptom categories in the Danish Index for Emergency Medical Care are presented in the table below.

|    | <b>Category</b>                 | <b>Note</b>                                                  |
|----|---------------------------------|--------------------------------------------------------------|
| 1  | Unconscious adult               |                                                              |
| 2  | Unconscious child               |                                                              |
| 3  | Foreign body in airway          |                                                              |
| 4  | Large scale accident            |                                                              |
| 5  | Ordered mission                 | Includes referrals and ambulance runs ordered by physicians. |
| 6  | Unclear problem                 |                                                              |
| 7  | Allergic reaction               |                                                              |
| 8  | Non-traumatic bleeding          |                                                              |
| 9  | Burn or electricity injury      |                                                              |
| 10 | Chest pain, heart disease       |                                                              |
| 11 | Diabetes                        |                                                              |
| 12 | Drowning                        |                                                              |
| 13 | Diving accident                 |                                                              |
| 14 | Animal bite or insect bite      |                                                              |
| 15 | Fever                           |                                                              |
| 16 | Poisoning in child              |                                                              |
| 17 | Childbirth                      |                                                              |
| 18 | Gynaecology, pregnancy          |                                                              |
| 19 | Headache                        |                                                              |
| 20 | Skin disease, rash              |                                                              |
| 21 | Hypo- and hyperthermia          |                                                              |
| 22 | Exposure to chemicals and gases |                                                              |
| 23 | Seizures                        |                                                              |
| 24 | Stomach or back pain            |                                                              |
| 25 | Possible death                  |                                                              |
| 26 | Impaired consciousness          |                                                              |
| 27 | Psychiatry, suicide             |                                                              |
| 28 | Breathing problems              |                                                              |
| 29 | Alcohol, poisoning, drugs       |                                                              |
| 30 | Sick child                      | Broad category pertaining particularly to young children.    |
| 31 | Minor wound, fracture, injury   |                                                              |
| 32 | Traffic accident                |                                                              |
| 33 | Accidents                       |                                                              |
| 34 | Urinary system                  |                                                              |
| 35 | Violence, abuse                 |                                                              |
| 36 | Ear, nose, throat               |                                                              |
| 37 | Eye                             |                                                              |

---
